# Supplementary material for: Optimization of Culture Conditions for Oxygen-Tolerant Regulatory [NiFe]-Hydrogenase Production from Ralstonia eutropha H16 in Escherichia coli
Source: MDPI journal article supplement (doi:10.3390/microorganisms9061195), 2021-05-31
Supplement: s1 [file s1]

Fan, et al. Supplementary figures

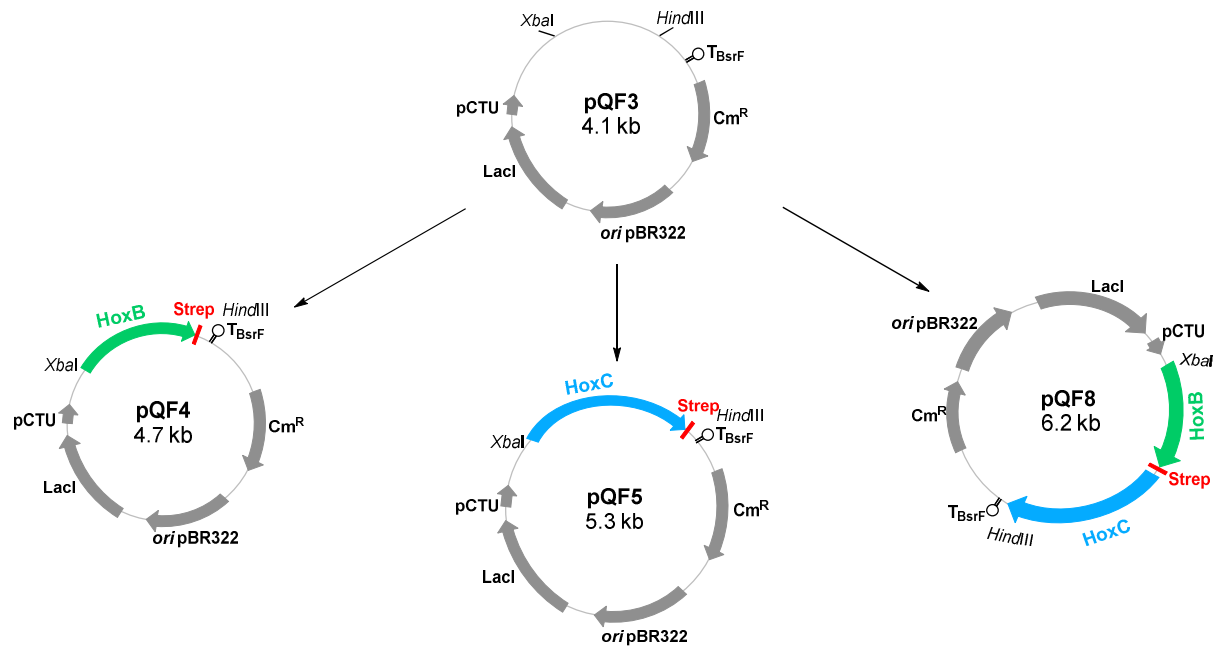

Figure S1: Plasmids used in this study

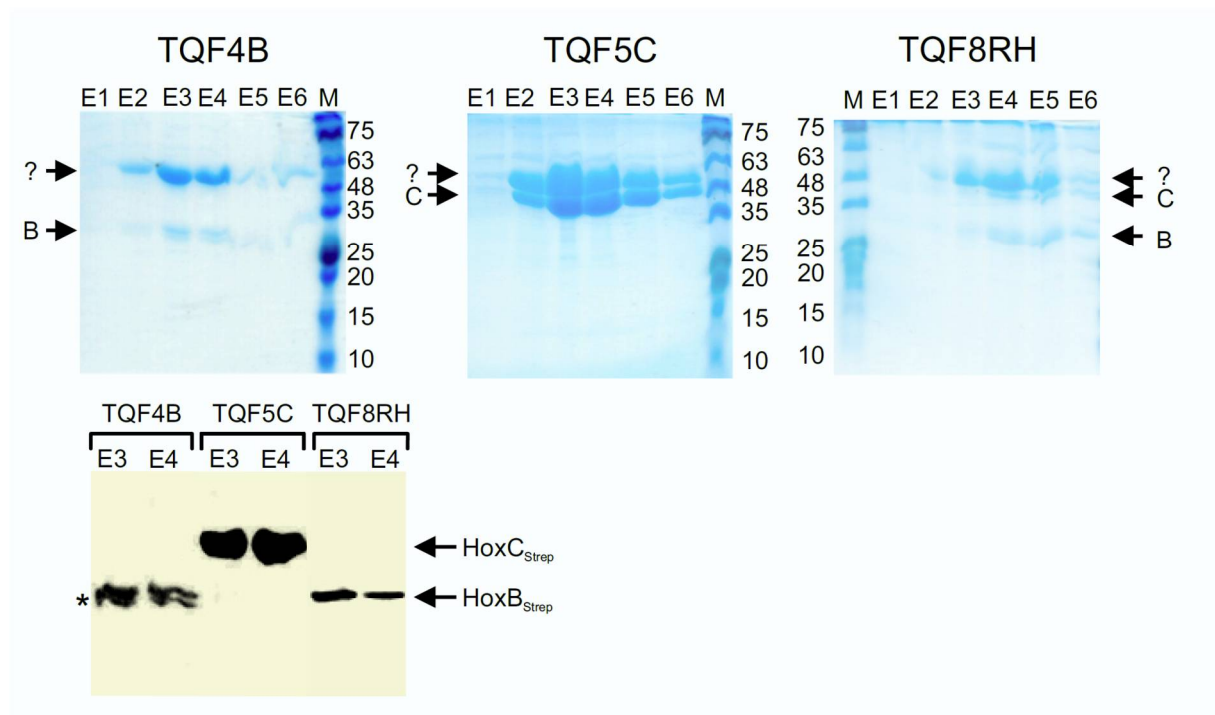

**Figure S2: Analysis of Hox protein production in *E. coli* TG1**

*E. coli* TG1 derivatives TQF4B, TQF5C or TQF8RH were cultivated in 50 ml TB medium in UYF at 37 °C. RH production was induced with 1 mM IPTG. Soluble RH was purified by affinity chromatography and subsequently analyzed by SDS-PAGE (upper panel) and Western blotting (bottom panel). 15 µL of the indicated elution fractions from the affinity purification were separated in 12 % PAA gels and either stained with colloidal Coomassie or subjected to immunoblotting using antibodies against the Strep-tag II peptide. HoxB<sub>Strep</sub> was purified from strain TQF4B and TQF8RH, HoxC was purified from strain TQF5C via its Strep-tag or from strain TQF8RH via co-purification with Strep-tagged HoxB. In all cases, an untagged contaminating protein is co-purified together with the Hox proteins. In preparations from TQF4B a second band with slightly lower molecular weight is detectable indicating proteolytic digestion of HoxB. The second band is indicated by an asterisk. **B**: HoxB; **C**: HoxC; **?**: unidentified contaminating protein; M: ROTI®Mark TRICOLOR.

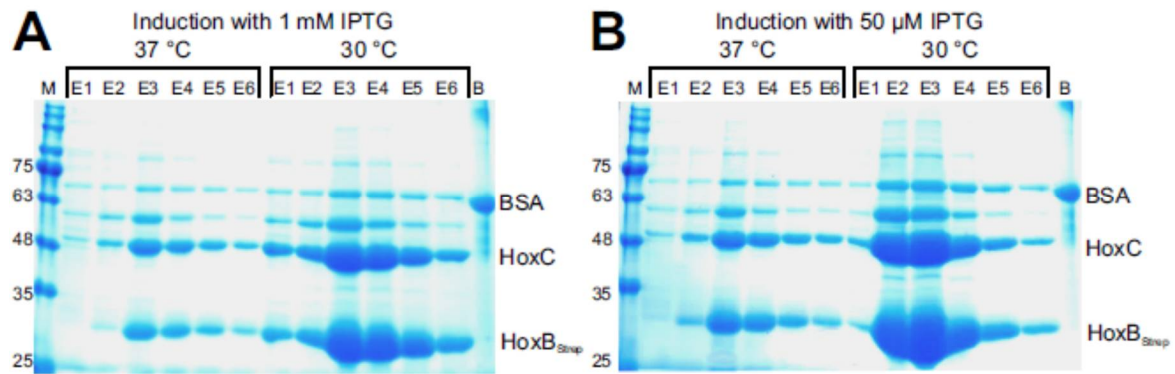

**Figure S3: RH production in *E. coli* BQF8RH**

*E. coli* BQF8RH was cultivated in 50 ml TB medium in UYF at 37 °C and 30 °C and RH production was induced with IPTG as indicated. Soluble RH was purified by affinity chromatography and subsequently analyzed by SDS-PAGE. (A) and (B) Coomassie stained gels of purified Strep-tagged HoxB and co-purified HoxC. Hox gene expression was induced with 1 mM (A) or 50 µM (B) IPTG, respectively. An amount of 15 µl of the elution fractions (E1-E6) from the affinity chromatography were loaded in each lane. ROTI®Mark TRICOLOR (Roth, Germany) (lane M) and 2 µg BSA (lane B) were used as marker

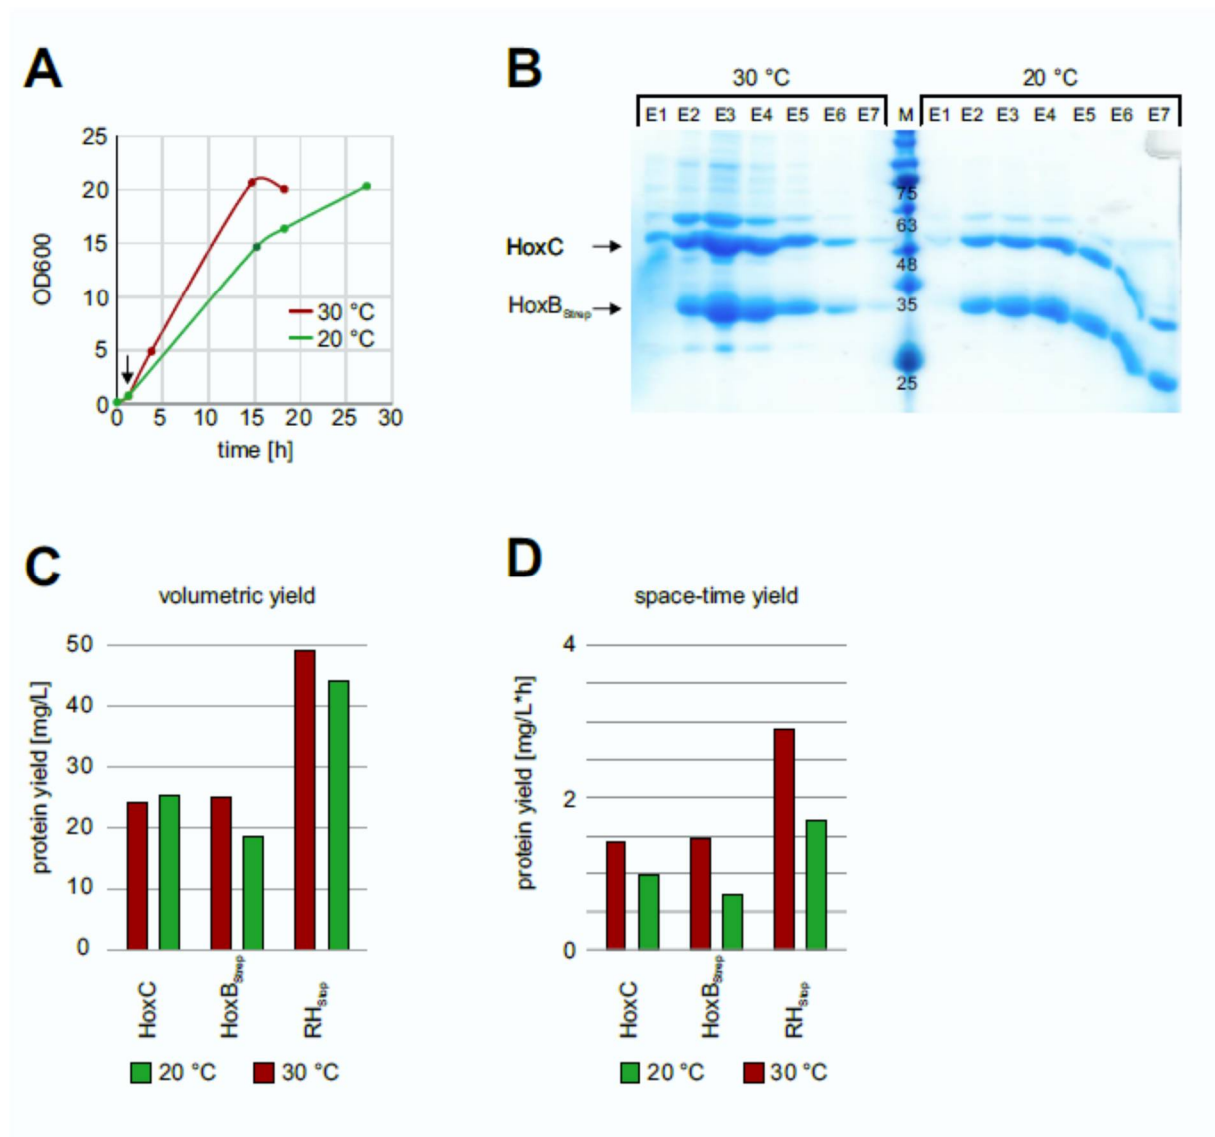

**Figure S4: Comparison of RH production at 20 °C and 30 °C**

*E. coli* strains BQF8RH was cultivated in 50 ml TB medium in UYF at 30 °C. After 75 minutes RH production was induced with 50  $\mu$ M IPTG. One flask was kept for 17 h at 30 °C whereas one flask was kept at 20 °C. Due to slower growth at 20 °C cells were harvested after 26 h when an OD<sub>600</sub> comparable to that of the 30 °C culture was reached. Soluble RH was purified by affinity chromatography and subsequently analyzed by SDS-PAGE. 5  $\mu$ L of the indicated elution fractions from the affinity purification were separated in 12 % PAA gels and stained with colloidal Coomassie. **(A)** growth curve; **(B)** Coomassie stained gel; **(C)** comparison of volumetric yield; **(D)** comparison of space-time yield

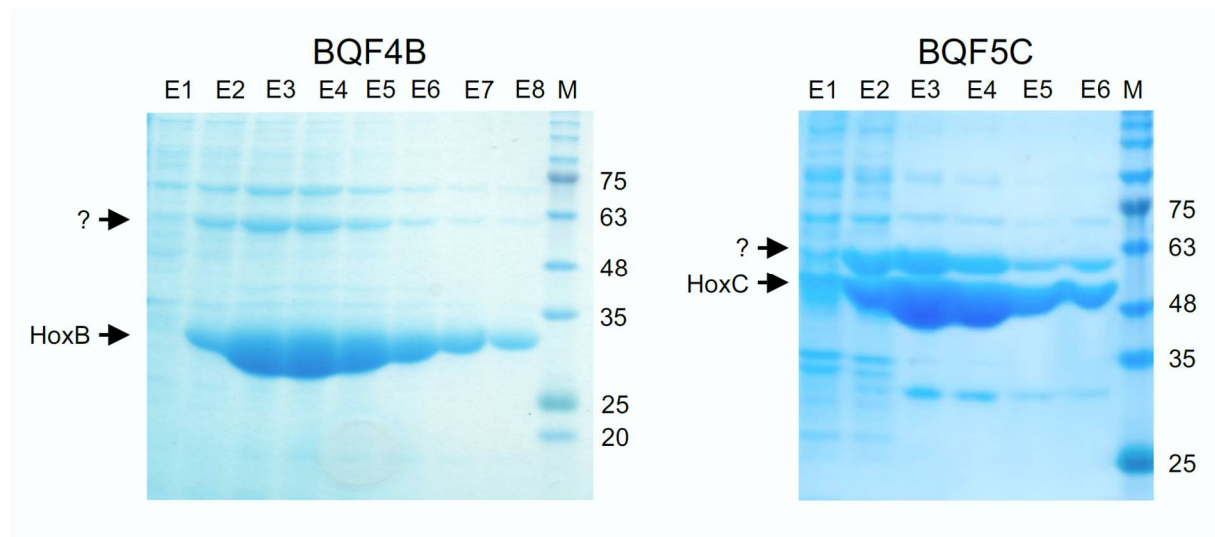

**Figure S5: Production of single Hox proteins *E. coli* BL21 Gold**

*E. coli* strains BQF4B and BQF5C were cultivated in 50 ml TB medium in UYF at 30 °C. RH production was induced with 50  $\mu$ M IPTG. Soluble RH was purified by affinity chromatography and subsequently analyzed by SDS-PAGE. 15  $\mu$ L of the indicated elution fractions from the affinity purification were separated in 12 % PAA gels and stained with colloidal Coomassie. HoxB<sub>Strep</sub> from strain BQF4B and HoxC from strain BQF5C were purified via their Strep-tag II. ?: unidentified contaminating protein; M: ROTI®Mark TRICOLOR.

**A**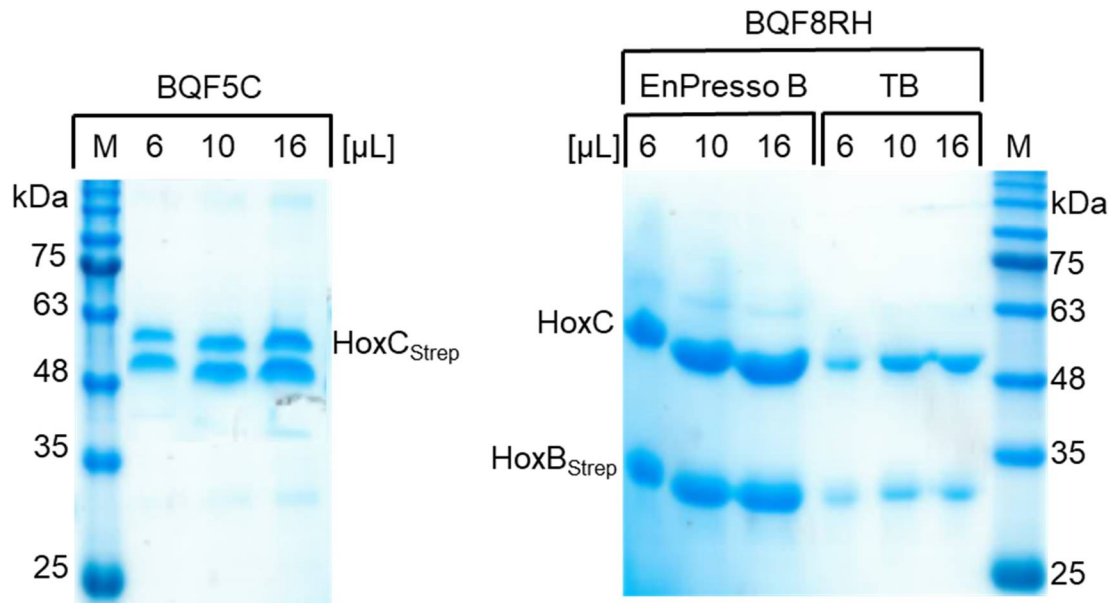**B**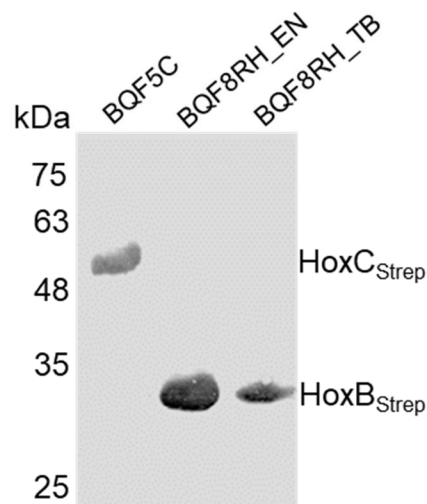

**Figure S6: SDS-PAGE analysis of purified HoxC and RH used for spectroscopic characterization**

*E. coli* strains BQF5C and BQF8RH were cultivated in 50 ml TB medium or boosted EnPresso B medium in UYF at 30 °C, 250 rpm. RH production was induced with 50 µM IPTG. Soluble RH was purified by affinity chromatography. Subsequently, the elution fractions E2-E6 were pooled and concentrated by ultrafiltration using Amicon filter (30 kDa) ready for activity measurement and spectroscopic characterization. The concentrated sample was diluted to approx. 0.5-1.0 mg/L measured by NanoDrop (A280 nm) and subsequently appropriate diluted sample volumes were separated in 12 % PAA gels and stained with colloidal Coomassie (**A**) and analyzed by Western blotting with antibodies against Strep-tag (**B**). M: ROTI®Mark TRICOLOR.

## Fan, et al. Supplementary tables

**Table S1: Strains used in this study**

| Strain                   | Genotyp                                                                                                                                                                      | Reference                 |
|--------------------------|------------------------------------------------------------------------------------------------------------------------------------------------------------------------------|---------------------------|
| <i>E. coli</i> TG1       | <i>E. coli</i> K-12 <i>glnV44 thi-1 Δ(lac-proAB) Δ(mcrB-hsdSM)5(r<sub>K</sub>-m<sub>K</sub>-)</i><br><i>F'</i> [ <i>traD36 proAB<sup>+</sup> lacI<sup>q</sup> lacZΔM15</i> ] | Baer <i>et al.</i> , 1984 |
| <i>E. coli</i> BL21 Gold | <i>E. coli</i> B <i>F-ompT hsdS(r<sub>B</sub>- m<sub>B</sub>-) dcm<sup>+</sup> Tet<sup>R</sup> gal endA The</i>                                                              | Agilent, Waldbronn        |
| <i>E. coli</i> TQF4B     | as TG1 with plasmid pQF4                                                                                                                                                     | This work                 |
| <i>E. coli</i> TQF5C     | as TG1 with plasmid pQF5                                                                                                                                                     | This work                 |
| <i>E. coli</i> TQF8RH    | as TG1 with plasmid pQF8                                                                                                                                                     | This work                 |
| <i>E. coli</i> BQF4B     | as BL21 Gold with plasmid pQF4                                                                                                                                               | This work                 |
| <i>E. coli</i> BQF5C     | as BL21 Gold with plasmid pQF5                                                                                                                                               | This work                 |
| <i>E. coli</i> BQF8RH    | as BL21 Gold with plasmid pQF8                                                                                                                                               | This work                 |

**Table S2: Plasmids used in this study**

| Plasmid | Description                                                                                                 | Reference                   |
|---------|-------------------------------------------------------------------------------------------------------------|-----------------------------|
| pCTUT7  | <i>E. coli</i> cloning vector, Cm <sup>R</sup> , Plac, MCS                                                  | Kraft <i>et al.</i> 2007    |
| pCH594  | <i>E. coli</i> cloning vector, Amp <sup>R</sup> , P <sub>SH</sub> , <i>hoxB</i> , <i>hoxC</i> , <i>hoxJ</i> | Kleihues <i>et al.</i> 2000 |
| pQF1    | as pCTUT7 with deletion of unique BstBI site                                                                | This work                   |
| pQF3    | as pQF1 with integration of <i>bsrF</i> transcription terminator                                            | This work                   |
| pQF4    | as pQF3 with integration of <i>hoxB</i>                                                                     | This work                   |
| pQF5    | as pQF3 with integration of <i>hoxC</i>                                                                     | This work                   |
| pQF8    | as pQF3 with integration of <i>hoxBC</i>                                                                    | This work                   |

**Table S3: Oligonucleotides used in this study**

| Name    | Sequence (starting with 5' end)                                                              | purpose |
|---------|----------------------------------------------------------------------------------------------|---------|
| MG0034  | CGT CGA CTC GAG CTC GCT GCA GA                                                               | C, pQF1 |
| MG0035  | CGT CTG CAG CGA GCT CGA GTC GA                                                               | C, pQF1 |
| MG0038  | AGT <u>TCT AGA</u> TGG CTT GGA GGA GAA ATG AAC GCG CCT GTA TGT                               | C, pQF4 |
| MG0039  | GTT TGG TGG AAG GGG TGG CCG GGC TCC TCA AAG CCG GGT TCA<br>GTG CAA                           | C, pQF4 |
| MG0040  | ATC <u>AAG CTT</u> ATT TTT CGA ACT GCG GGT GGC TCC AAG CAG AGG<br>GTG TTT GGT GGA AGG GGT GG | C, pQF4 |
| MG0041  | CAG <u>TTC GAA</u> AAA TAG GAG GCG AGC ATG GAA CGT TTG                                       | C, pQF8 |
| MG0042  | ATC <u>AAG CTT</u> TCA ATG CAC GGT GCA CAC CAT G                                             | C, pQF8 |
| MG0043  | ATG <u>TCT AGA</u> AAT AGG AGG CGA GCA TGG AAC                                               | C, pQF5 |
| MG0044  | ACT <u>AAG CTT</u> ATT TCT CAA ACT GCG GGT GGC TCC AAG CAG AAT<br>GCA CGG TGC ACA CCA TGC AG | C, pQF5 |
| MG0046  | CGA ACG TGG CGA GAA AGG AA                                                                   | S       |
| MG0051  | AGC TAC TAG TAG ATC TAA AAA GGC GTT TGG CTA AGG CAA ACG<br>CCT TTT TAA GCT TG                | C, pQF3 |
| MG0052  | GAT CCA AGC TTA AAA AGG CGT TTG CCT TAG CCA AAC GCC TTT<br>TTA GAT CTA CTA GT                | C, pQF3 |
| M13-24R | CGG ATA ACA ATT TCA CAC AGG                                                                  | S       |

—

S, sequencing; C, construction of plasmid followed by plasmid designation; Strep-tag sequence is highlighted in red; restriction sites are underlined
